# Supplementary material for: Novel synthesis of a soy-based polyol for a polyurethane rigid foam
Source: Royal Society of Chemistry journal article supplement (doi:10.1039/c6ra20855j), 2016-01-01
Supplement: c6ra20855j1.pdf [file c6ra20855j1.pdf]

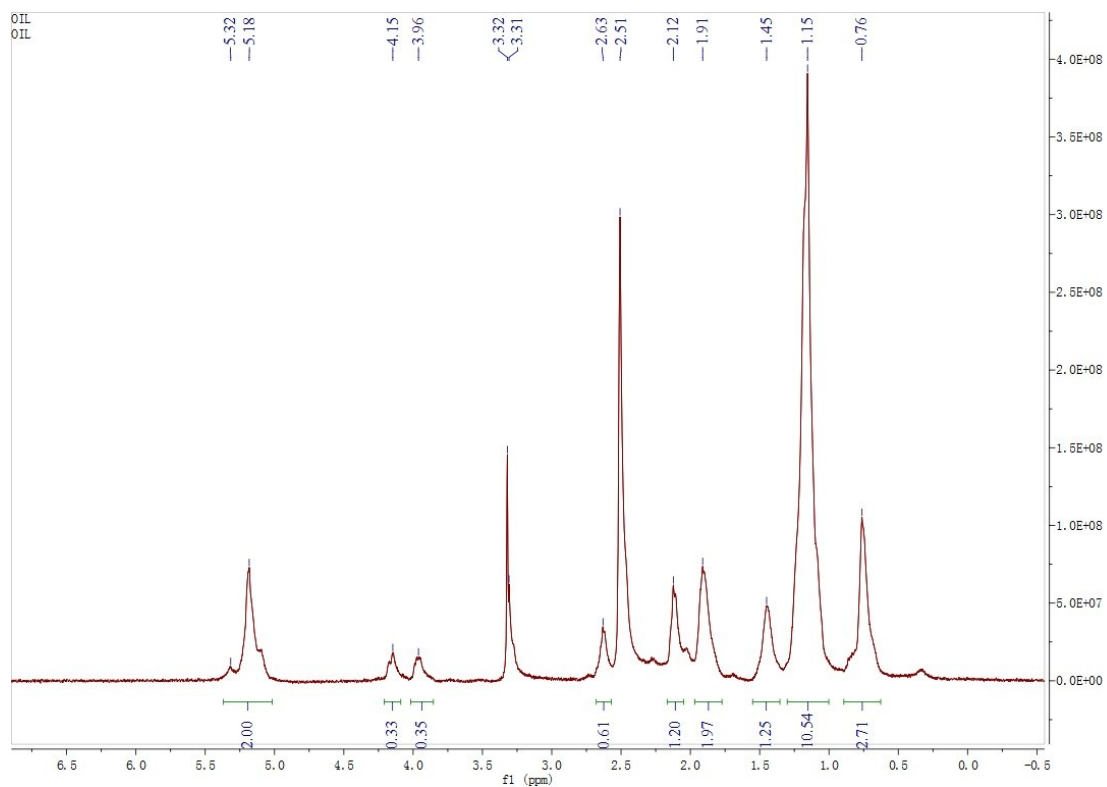

**Fig. S1** <sup>1</sup>H NMR spectra of the soybean oil

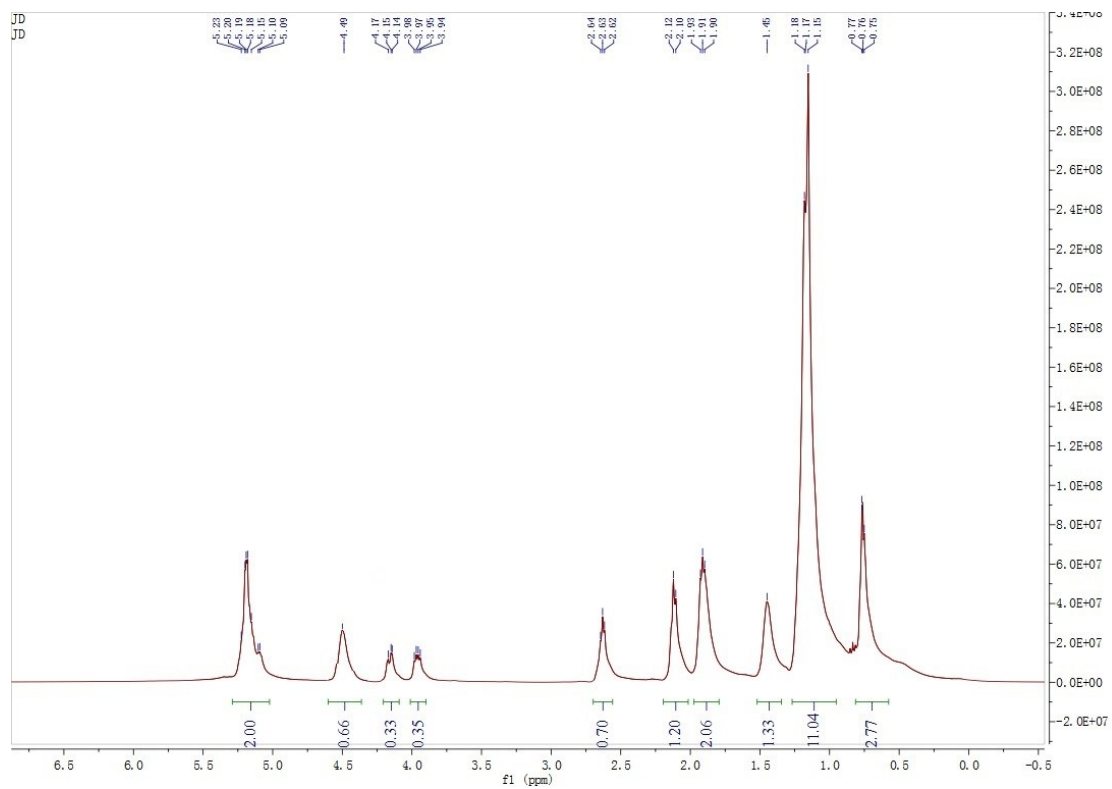

**Fig. S2**  $^1\text{H}$  NMR spectra of the allylic oxidized product
